# Supplementary material
Source: PubMed Central journal article supplement (PMC4649633)
Supplement: 10.1534_115.180794_genetics.115.180794-2.pdf [file 10.1534_115.180794_genetics.115.180794-2.pdf]

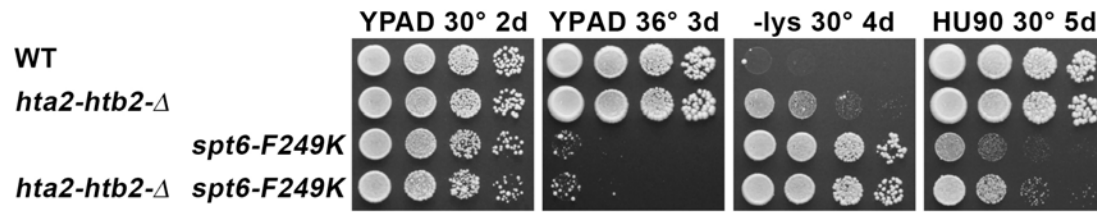

**Figure S2**

Deletion of *HTA2-HTB2* has mild effects on an *spt6-F249K* strain. Strains with the relevant genotypes listed (Table 1) were tested for phenotypes as in Fig 1.
