# Supplementary material
Source: PubMed Central journal article supplement (PMC4649633)
Supplement: 10.1534_115.180794_genetics.115.180794-3.pdf [file 10.1534_115.180794_genetics.115.180794-3.pdf]

## A

*spt16-11* histone deletion strain

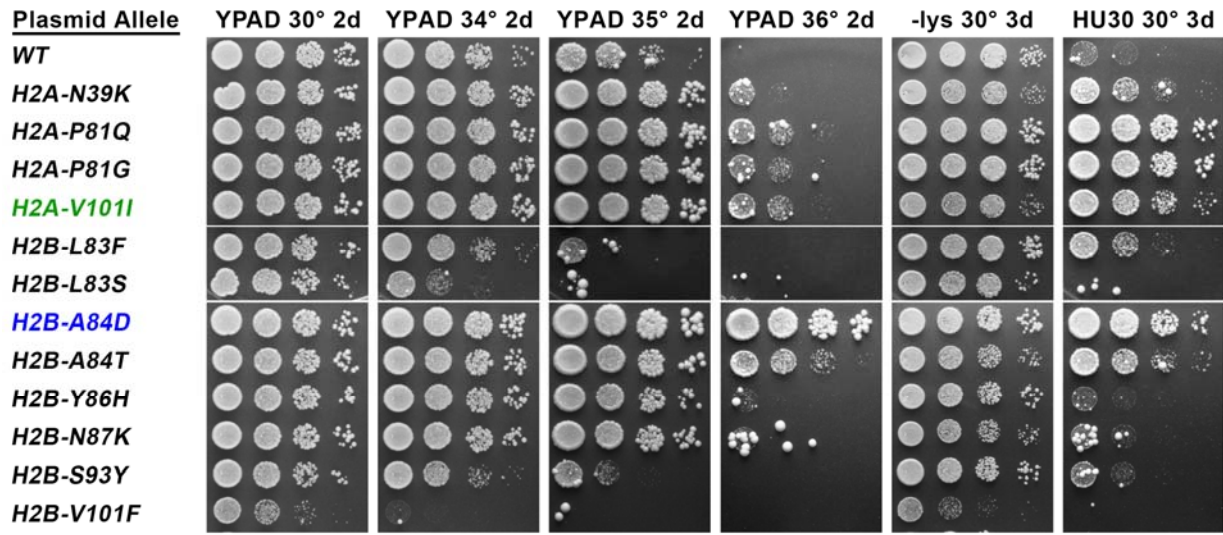

## B

WT histone deletion strain

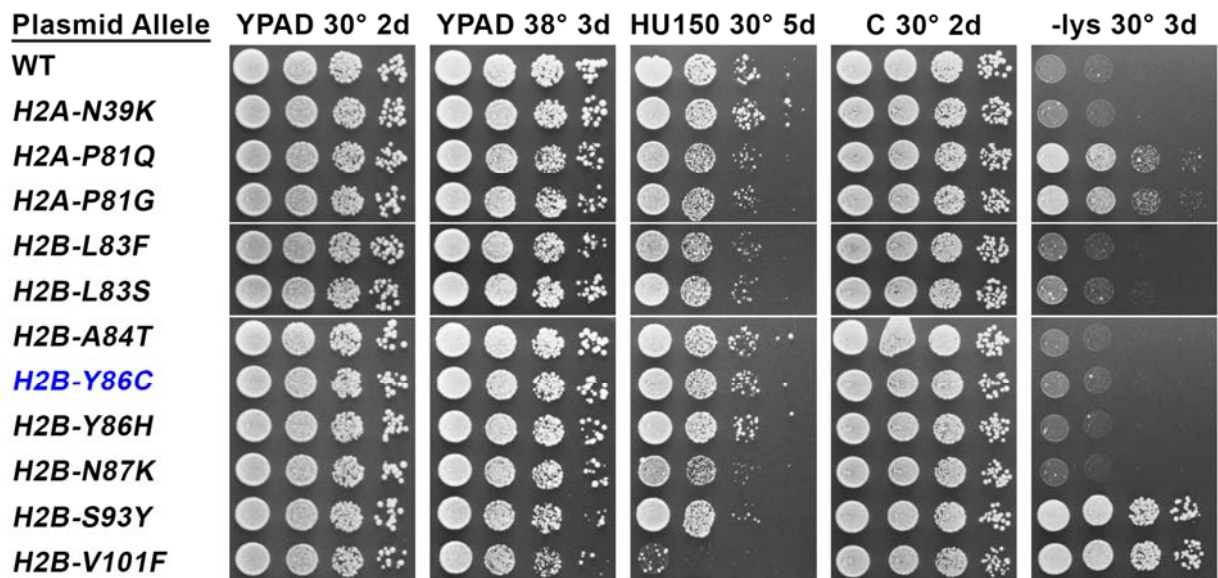

**C***pob3-Q308K* histone deletion strain; viability test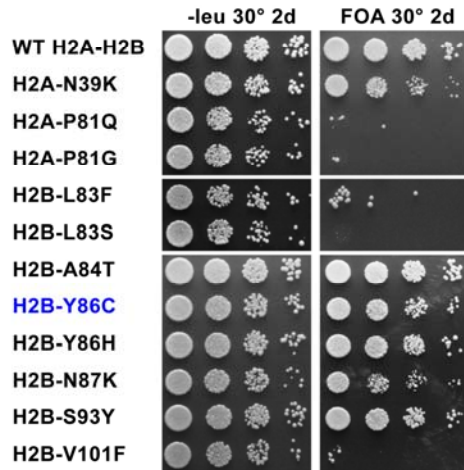*pob3-Q308K* histone deletion strain; phenotypes of viable combinations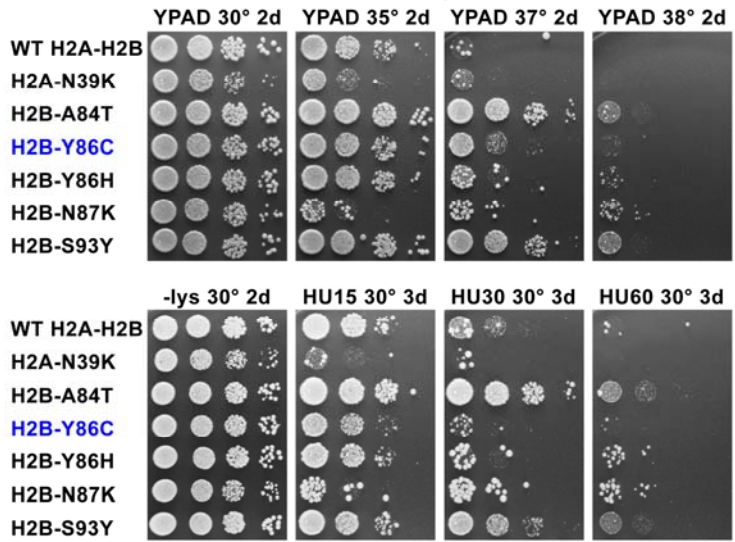**Figure S1**

Effects of *spt6-F249K* suppressors in FACT mutants or a WT strain. Tests were conducted as in Fig 1. A) Strain 9029-3-2 pTF237 (*spt16-11* with histone deletions) was transformed with plasmids carrying suppressors of *spt6-F249K* to test for overlap between the two sets of suppressors. B) Strain 9028-6-1 pTF237 (WT with histone deletions) was tested as above to determine the effects of histone mutations in an otherwise normal strain. C) Strain 9028-1-4 pTF237 (*pob3-Q308K* with histone deletions) was tested with the *spt6-F249K* suppressor plasmids and tested as above. Only a subset of the plasmids was able to support growth of the *pob3-Q308K* strain, with others failing to grow on medium containing FOA, indicating inability to lose the WT histone plasmid pTF237 (left panel). Strains that survived this selection were tested for phenotypes as above (right panel).
