# Supplementary material
Source: PubMed Central journal article supplement (PMC4649633)
Supplement: 10.1534_115.180794_genetics.115.180794-4.pdf [file 10.1534_115.180794_genetics.115.180794-4.pdf]

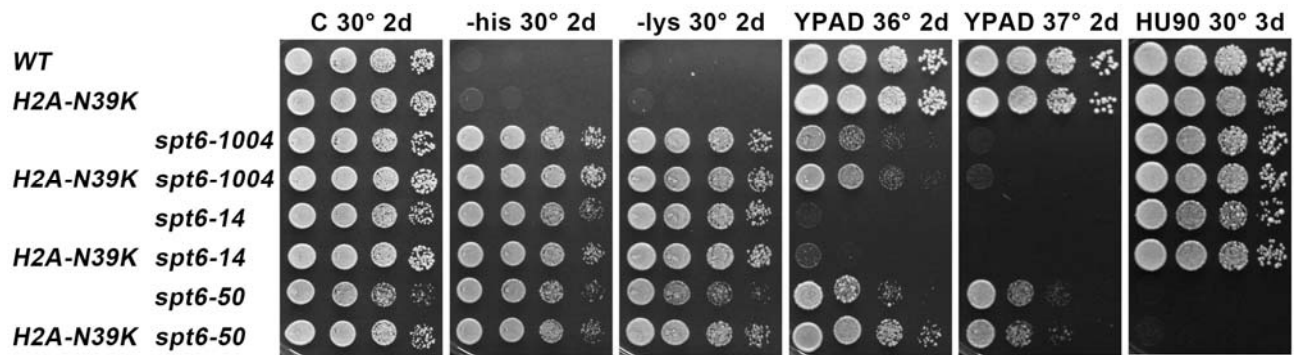

### Figure S3

H2A-N39K has minor effects on other alleles of *spt6*. Mutations affecting the central core (*spt6-1004* and *spt6-14*) or C-terminal domain (*spt6-50*) of Spt6 do not show the strong suppression of phenotypes by *hta1-N39K hta2-N39K* that was observed with *spt6-F249K*. Each allele caused a strong Spt<sup>-</sup> phenotype detected as His<sup>+</sup> and Lys<sup>+</sup> phenotypes with these strains that carry both *his4-912 $\theta$*  and *lys2-128 $\theta$*  reporters (Table 1). Neither this nor other phenotypes associated with these alleles were strongly suppressed by H2A-N39K.
